# Supplementary material for: Economic, Environmental and Health Implications of Enhanced Ventilation in Office Buildings
Source: Int J Environ Res Public Health. 2015 Nov 18;12(11):14709–22. doi: 10.3390/ijerph121114709 (PMC4661675; doi:10.3390/ijerph121114709)
Supplement: Supplementary File 1 [file ijerph-12-14709-s001.pdf]

# Economic, Environmental and Health Implications of Enhanced Ventilation in Office Buildings

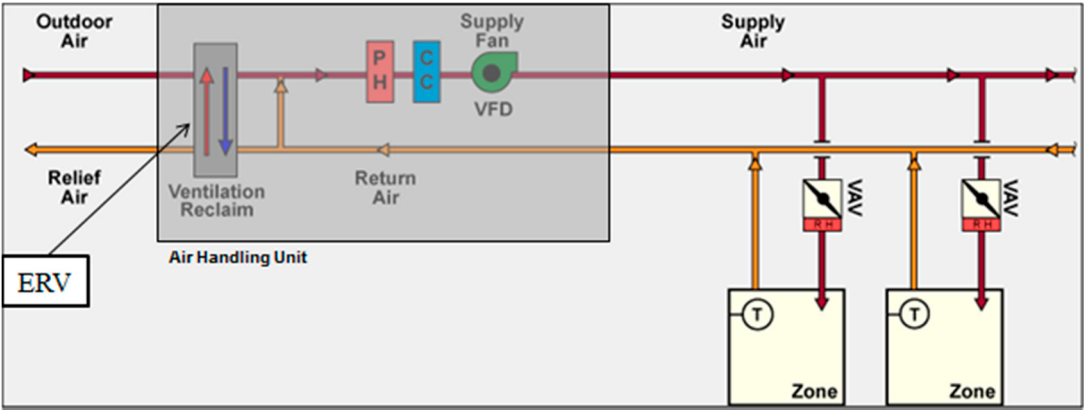

Figure S1. Variable air volume ventilation system schematic.

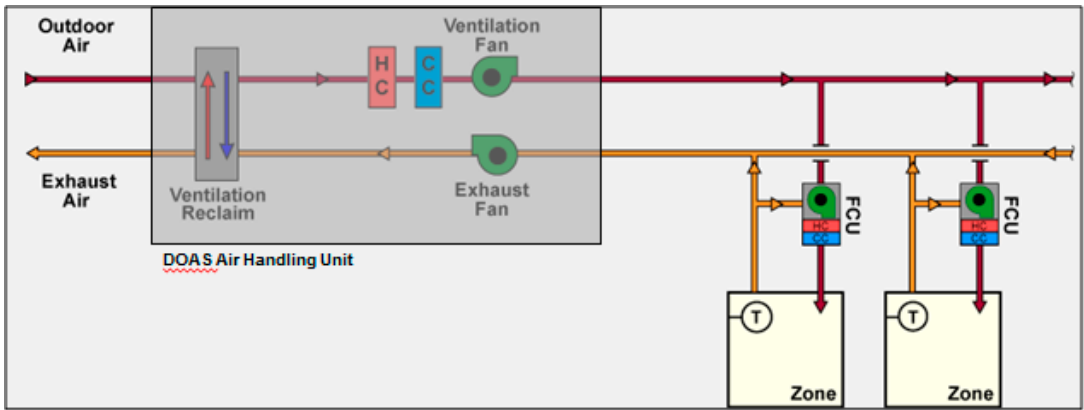

Figure S2. Fan coil unit ventilation system schematic.

**Table S1.** Simulated Annual HVAC Energy Cost (\$/year). Electric energy cost for HVAC fans, motors, pumps, and chillers, plus gas cost for hot water boilers.

| Ventilation Rate      | Austin   | Charlotte | San Francisco | Baltimore | Albuquerque | Boston   | Boise    |
|-----------------------|----------|-----------|---------------|-----------|-------------|----------|----------|
| Variable Air Volume   |          |           |               |           |             |          |          |
| 20 cfm/person         | \$16,142 | \$13,728  | \$7,143       | \$17,395  | \$12,521    | \$19,301 | \$11,054 |
| 27.6 cfm/person       | \$18,056 | \$15,683  | \$8,370       | \$20,187  | \$13,635    | \$22,526 | \$12,814 |
| 27.6 cfm/person + ERV | \$15,987 | \$13,841  | \$8,908       | \$16,984  | \$13,532    | \$19,080 | \$11,093 |
| 40 cfm/person         | \$22,325 | \$19,957  | \$11,359      | \$26,067  | \$16,364    | \$29,290 | \$16,623 |
| 40 cfm/person + ERV   | \$18,652 | \$16,556  | \$11,816      | \$20,400  | \$15,215    | \$23,070 | \$13,152 |
| Fan Coil Unit         |          |           |               |           |             |          |          |
| 20 cfm/person         | \$17,077 | \$17,270  | \$16,639      | \$23,131  | \$18,600    | \$28,334 | \$17,134 |
| 27.6 cfm/person       | \$19,037 | \$19,583  | \$18,969      | \$26,440  | \$20,683    | \$32,404 | \$19,598 |
| 27.6 cfm/person + ERV | \$17,029 | \$16,342  | \$16,625      | \$21,176  | \$18,408    | \$26,097 | \$15,319 |
| 40 cfm/person         | \$22,222 | \$23,354  | \$22,788      | \$31,820  | \$24,070    | \$39,020 | \$23,601 |
| 40 cfm/person + ERV   | \$19,308 | \$18,657  | \$19,377      | \$24,207  | \$20,712    | \$29,892 | \$17,403 |

**Table S2.** Simulated Annual HVAC Energy Use (Million Btu/year). Site electric energy use for HVAC fans, motors, pumps, and chillers, plus site natural gas use for hot water boilers.

| Ventilation Rate           | Austin | Charlotte | San Francisco | Baltimore | Albuquerque | Boston | Boise |
|----------------------------|--------|-----------|---------------|-----------|-------------|--------|-------|
| <b>Variable Air Volume</b> |        |           |               |           |             |        |       |
| 20 cfm/person              | 892    | 894       | 422           | 1010      | 746         | 1088   | 1033  |
| 27.6 cfm/person            | 1018   | 1,053     | 527           | 1224      | 876         | 1339   | 1250  |
| 27.6 cfm/person + ERV      | 879    | 873       | 492           | 928       | 747         | 976    | 964   |
| 40 cfm/person              | 1291   | 1,388     | 763           | 1644      | 1,160       | 1820   | 1695  |
| 40 cfm/person + ERV        | 1045   | 1,068     | 680           | 1141      | 879         | 1209   | 1169  |
| <b>Fan Coil Unit</b>       |        |           |               |           |             |        |       |
| 20 cfm/person              | 1002   | 1145      | 879           | 1348      | 1130        | 1502   | 1498  |
| 27.6 cfm/person            | 1139   | 1330      | 1065          | 1591      | 1317        | 1784   | 1763  |
| 27.6 cfm/person + ERV      | 892    | 927       | 583           | 1037      | 897         | 1118   | 1135  |
| 40 cfm/person              | 1363   | 1633      | 1370          | 1984      | 1622        | 2242   | 2193  |
| 40 cfm/person + ERV        | 1006   | 1051      | 678           | 1187      | 1015        | 1283   | 1288  |

© 2015 by the authors; licensee MDPI, Basel, Switzerland. This article is an open access article distributed under the terms and conditions of the Creative Commons Attribution license (<http://creativecommons.org/licenses/by/4.0/>).
